# Supplementary material for: Biocompatible fluorocarbon liquid underlays for in situ extraction of isoprenoids from microbial cultures
Source: Royal Society of Chemistry journal article supplement (doi:10.1039/d2ra01112c), 2022-01-01
Supplement: d2ra01112c1.pdf [file d2ra01112c1.pdf]

1

2

Supporting information for

3

4 **Biocompatible fluorocarbon liquid underlays for in situ extraction**

5 **of isoprenoids from microbial cultures**

6

7

Sebastian Overmans <sup>\*a</sup> and Kyle J Lauersen <sup>a</sup>

8

9 <sup>a</sup> Biological and Environmental Sciences and Engineering Division, King Abdullah  
10 University of Science and Technology (KAUST), Thuwal 23955-6900, Saudi Arabia

11

12

13

14

15

16

17 **Contents of this file**

18

19 Suppl. Figures 1 & 2

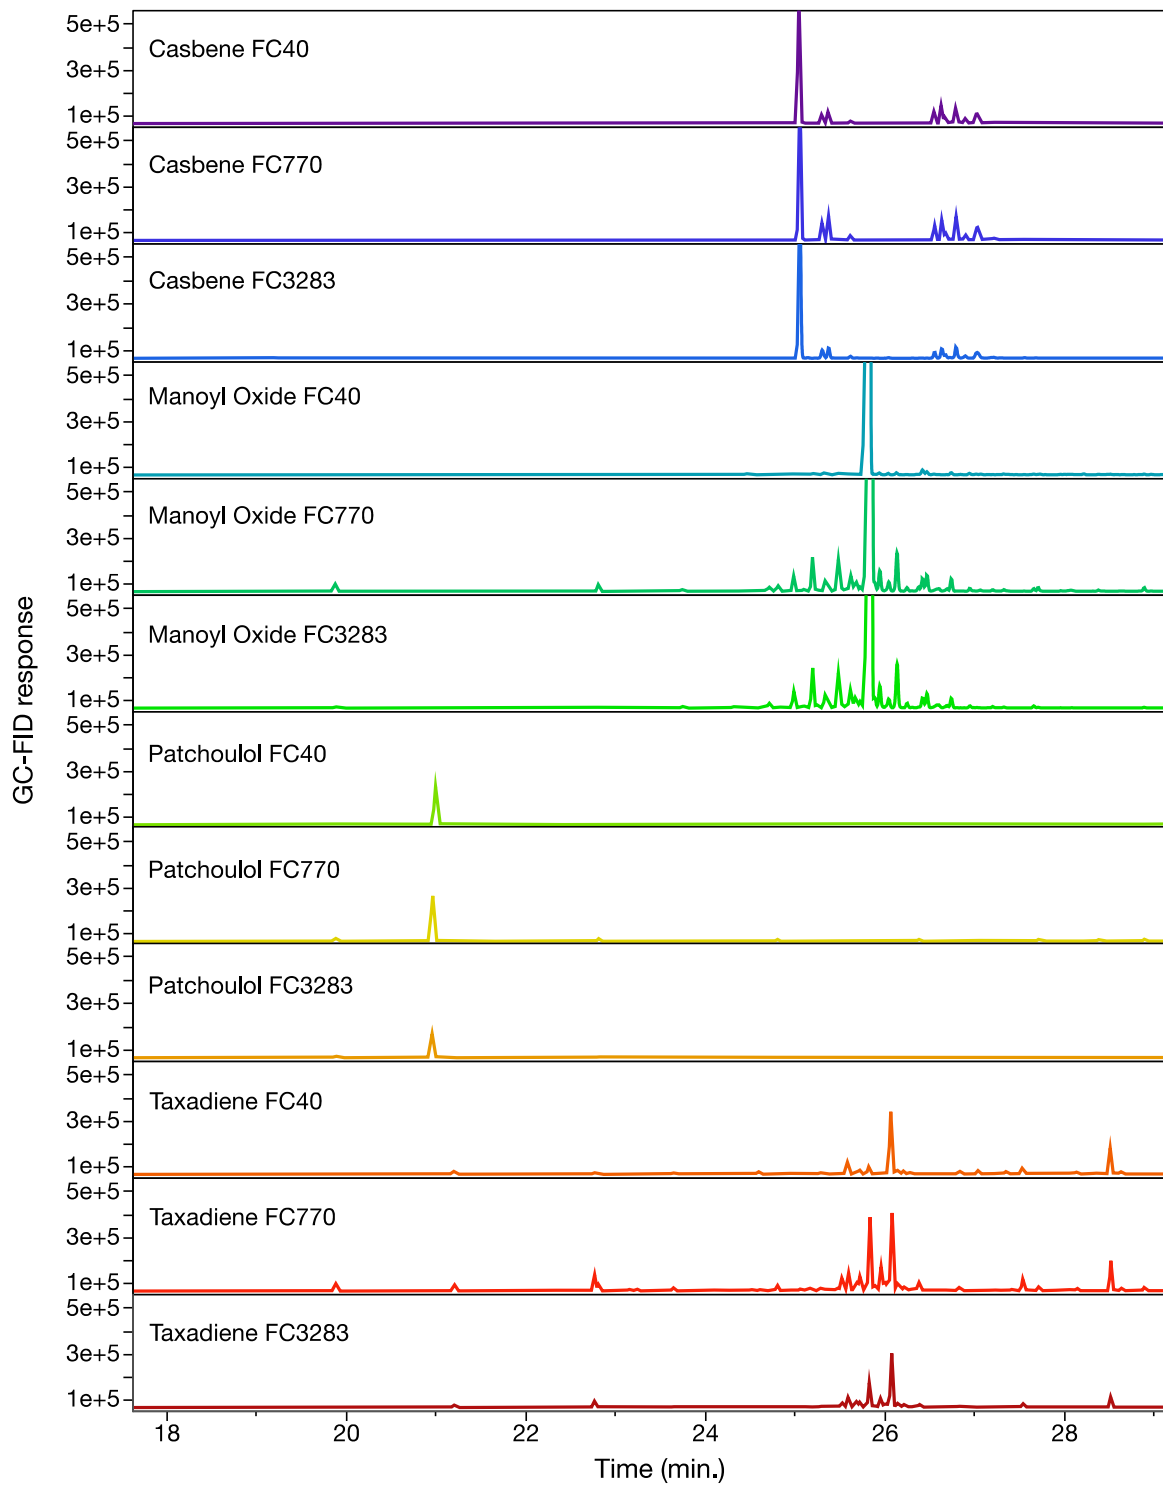

20

21 **Suppl. Figure 1.** Representative GC-FID chromatograms of FC-40, FC-70 and FC-  
 22 3283 underlays after 10 d of 2-phase solvent-medium culturing with different  
 23 engineered terpenoid-producing *C. reinhardtii* strains.

24

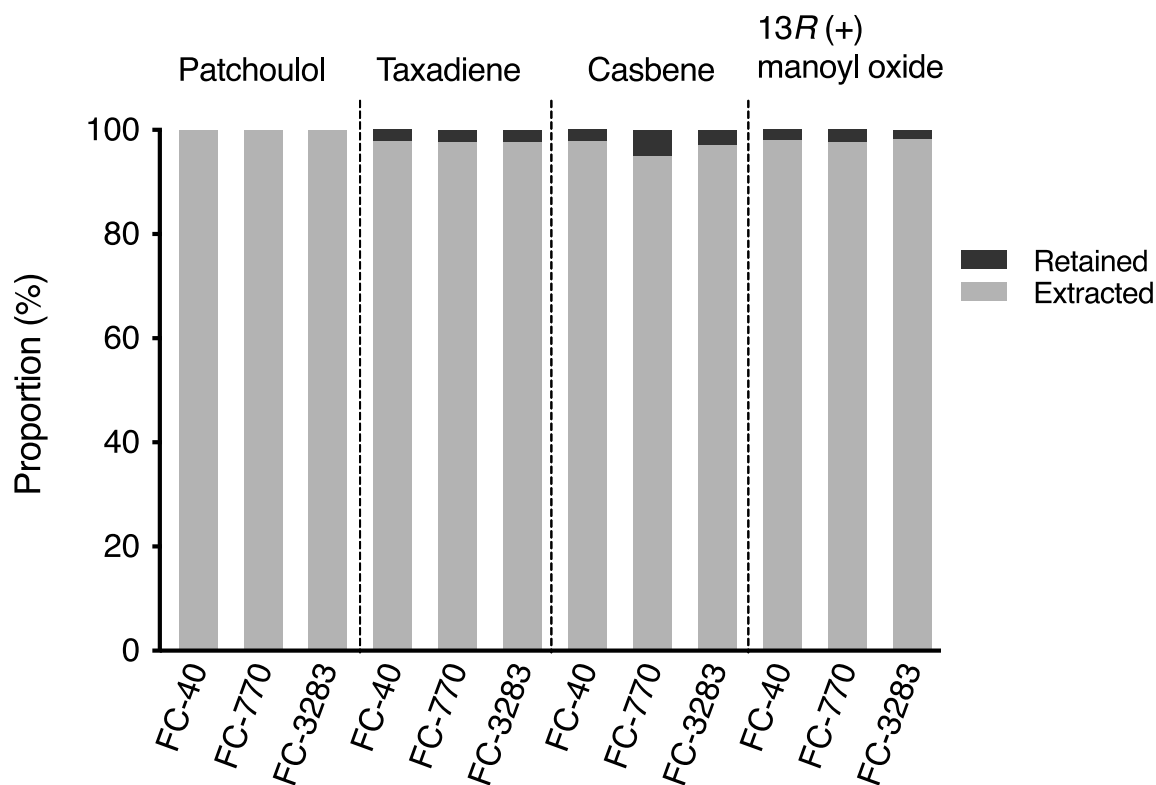

26

27

28 **Suppl. Figure 2.** Extraction efficiency of various terpenoids accumulated in different  
 29 FCs after accumulation from two-phase engineered algal culture. Liquid-liquid  
 30 extraction with 96% ethanol (1:1 v/v) for 16 h was performed on FCs. Grey bars  
 31 indicate the proportion (%) of terpenoid concentration observed in ethanol after  
 32 extraction compared to starting concentration in each FC.
